# Supplementary material for: The Impact of Stress-Induced Hyperglycemia on Deep Vein Thrombosis Formation in Trauma Patients
Source: Research Square preprint supplement (doi:10.21203/rs.3.rs-7519174/v1), 2025-10-17
Supplement: Supplementary file 1 [file 48cb308c22839efd2606fe0e.docx]

1. Diabetic patients had higher FBG but lower SHR versus SIH patients after trauma.

2. Diabetics had lower D-dimer, shorter stays, and reduced costs versus SIH patients.

3. D-dimer was positively correlated with before-surgery SHR in trauma patients.

4. SHR serves as a risk factor for DVT in trauma patients.
